# Supplementary material
Source: PubMed Central journal article supplement (PMC7083250)
Supplement: NIHMS1544804-supplement-1.pdf [file NIHMS1544804-supplement-1.pdf]

**Supplemental Table 1.** Age-adjusted colorectal cancer incidence rates per 100,000 person-years by year since baseline colonoscopy

| Years After Baseline Colonoscopy | Person-years | Colorectal Cancer Cases | Crude Rate* | Age-adjusted Incidence Rates* (95% CI) |
|----------------------------------|--------------|-------------------------|-------------|----------------------------------------|
| <b>No Adenoma Group</b>          |              |                         |             |                                        |
| Year 1                           | 33856        | 4                       | 11.8        | 11.4 (3.1, 19.7)                       |
| Year 2                           | 42965        | 4                       | 9.3         | 11.8 (3.2, 20.4)                       |
| Year 3                           | 40971        | 13                      | 31.7        | 28.9 (15.4, 42.4)                      |
| Year 4                           | 39265        | 13                      | 33.1        | 32.6 (17.3, 47.8)                      |
| Year 5                           | 37747        | 9                       | 23.8        | 22.0 (10.1, 34.0)                      |
| Year 6                           | 36380        | 11                      | 30.2        | 27.5 (13.7, 41.3)                      |
| Year 7                           | 35048        | 11                      | 31.4        | 30.7 (15.3, 46.1)                      |
| Year 8                           | 28991        | 21                      | 72.4        | 73.6 (45.5, 101.6)                     |
| Year 9                           | 19914        | 12                      | 60.3        | 58.9 (30.4, 87.4)                      |
| Year 10                          | 12697        | 11                      | 86.6        | 76.7 (38.3, 115.2)                     |
| ≥11 years                        | 10926        | 8                       | 73.2        | 66.9 (28.9, 105.0)                     |
| Overall                          | 338759       | 117                     | 34.5        | 31.1 (25.7, 36.5)                      |
| <b>Low-Risk Adenoma Group</b>    |              |                         |             |                                        |
| Year 1                           | 8095         | 2                       | 24.7        | 19.1 (2.3, 35.8)                       |
| Year 2                           | 10255        | 2                       | 19.5        | 19.3 (2.3, 36.2)                       |
| Year 3                           | 9766         | 3                       | 30.7        | 28.0 (5.8, 50.2)                       |
| Year 4                           | 9351         | 10                      | 107.0       | 108.7 (52.1, 165.3)                    |
| Year 5                           | 8957         | 4                       | 44.7        | 37.5 (10.2, 64.8)                      |
| Year 6                           | 8616         | 5                       | 58.0        | 50.5 (16.4, 84.6)                      |
| Year 7                           | 8277         | 6                       | 72.5        | 60.8 (22.3, 99.3)                      |
| Year 8                           | 6634         | 2                       | 30.2        | 21.8 (2.6, 41.0)                       |
| Year 9                           | 4297         | 1                       | 23.3        | 19.7 (0.5, 38.9)                       |
| Year 10                          | 2563         | 1                       | 39.0        | 35.1 (0.9, 69.4)                       |
| ≥11 years                        | 2010         | 1                       | 49.7        | 48.0 (1.2, 94.7)                       |
| Overall                          | 78820        | 37                      | 46.9        | 38.8 (27.3, 50.2)                      |
| <b>High-Risk Adenoma Group</b>   |              |                         |             |                                        |
| Year 1                           | 5563         | 1                       | 18.0        | 15.0 (0.4, 29.6)                       |
| Year 2                           | 7025         | 11                      | 156.6       | 122.9 (61.4, 184.5)                    |
| Year 3                           | 6654         | 5                       | 75.1        | 65.6 (21.3, 109.9)                     |
| Year 4                           | 6340         | 8                       | 126.2       | 109.5 (47.3, 171.8)                    |
| Year 5                           | 6033         | 3                       | 49.7        | 38.0 (7.8, 68.1)                       |
| Year 6                           | 5770         | 13                      | 225.3       | 209.7 (111.7, 307.8)                   |
| Year 7                           | 5522         | 7                       | 126.8       | 128.4 (51.6, 205.1)                    |
| Year 8                           | 4465         | 3                       | 67.2        | 106.6 (22.0, 191.3)                    |
| Year 9                           | 2900         | 3                       | 103.4       | 130.5 (26.9, 234.1)                    |
| Year 10                          | 1612         | 3                       | 186.1       | 217.7 (44.9, 390.5)                    |
| ≥11 years                        | 1211         | 3                       | 247.7       | 194.7 (40.1, 349.2)                    |
| Overall                          | 53095        | 60                      | 113.0       | 90.8 (69.3, 112.4)                     |

CI, confidence interval

\*Colorectal cancer cases per 100,000 persons screened

**Supplemental Table 2.** Cumulative colorectal cancer incidence and mortality by adenoma findings at the baseline colonoscopy

| Years of Follow-up                    | No adenoma on baseline exam |                          |                                                                   | Low-risk adenoma on baseline exam |                          |                                                                   | High-risk adenoma on baseline exam |                          |                                                                   |
|---------------------------------------|-----------------------------|--------------------------|-------------------------------------------------------------------|-----------------------------------|--------------------------|-------------------------------------------------------------------|------------------------------------|--------------------------|-------------------------------------------------------------------|
|                                       | No. At Risk                 | No. of Cumulative Events | Cumulative Event Probability of A or B (%), (95% CI) <sup>a</sup> | No. At Risk                       | No. of Cumulative Events | Cumulative Event Probability of A or B (%), (95% CI) <sup>a</sup> | No. At Risk                        | No. of Cumulative Events | Cumulative Event Probability of A or B (%), (95% CI) <sup>a</sup> |
| <b>A. Colorectal cancer</b>           |                             |                          |                                                                   |                                   |                          |                                                                   |                                    |                          |                                                                   |
| 0                                     | 45881                       | 0                        | 0.00 (0.00, 0.00)                                                 | 10978                             | 0                        | 0.00 (0.00, 0.00)                                                 | 7563                               | 0                        | 0.00 (0.00, 0.00)                                                 |
| 1                                     | 44034                       | 4                        | 0.01 (0.00, 0.03)                                                 | 10524                             | 2                        | 0.02 (0.00, 0.07)                                                 | 7224                               | 1                        | 0.03 (0.01, 0.11)                                                 |
| 2                                     | 41918                       | 8                        | 0.02 (0.01, 0.04)                                                 | 9986                              | 4                        | 0.05 (0.02, 0.12)                                                 | 6830                               | 12                       | 0.19 (0.11, 0.32)                                                 |
| 3                                     | 40115                       | 21                       | 0.05 (0.03, 0.08)                                                 | 9554                              | 7                        | 0.07 (0.03, 0.14)                                                 | 6500                               | 17                       | 0.26 (0.16, 0.41)                                                 |
| 4                                     | 38486                       | 34                       | 0.08 (0.06, 0.12)                                                 | 9142                              | 17                       | 0.18 (0.11, 0.28)                                                 | 6177                               | 25                       | 0.37 (0.25, 0.55)                                                 |
| 5                                     | 37045                       | 43                       | 0.11 (0.08, 0.14)                                                 | 8784                              | 21                       | 0.23 (0.15, 0.35)                                                 | 5896                               | 28                       | 0.42 (0.29, 0.61)                                                 |
| 6                                     | 35688                       | 54                       | 0.14 (0.11, 0.18)                                                 | 8449                              | 26                       | 0.29 (0.20, 0.42)                                                 | 5644                               | 41                       | 0.64 (0.47, 0.88)                                                 |
| 7                                     | 34444                       | 65                       | 0.17 (0.13, 0.22)                                                 | 8104                              | 32                       | 0.36 (0.26, 0.51)                                                 | 5414                               | 48                       | 0.77 (0.58, 1.02)                                                 |
| 8                                     | 23973                       | 86                       | 0.24 (0.20, 0.30)                                                 | 5324                              | 34                       | 0.40 (0.28, 0.56)                                                 | 3630                               | 51                       | 0.84 (0.64, 1.10)                                                 |
| 9                                     | 16168                       | 98                       | 0.31 (0.25, 0.38)                                                 | 3423                              | 35                       | 0.44 (0.31, 0.62)                                                 | 2254                               | 54                       | 0.94 (0.71, 1.24)                                                 |
| 10                                    | 9417                        | 109                      | 0.39 (0.32, 0.49)                                                 | 1792                              | 36                       | 0.44 (0.31, 0.62)                                                 | 1049                               | 57                       | 1.24 (0.90, 1.70)                                                 |
| 11                                    | 4717                        | 116                      | 0.51 (0.40, 0.64)                                                 | 853                               | 36                       | 0.57 (0.34, 0.97)                                                 | 493                                | 58                       | 1.56 (0.97, 2.53)                                                 |
| 12                                    | 1537                        | 117                      | 0.51 (0.40, 0.64)                                                 | 281                               | 37                       | 0.57 (0.34, 0.97)                                                 | 189                                | 60                       | 2.03 (1.13, 3.61)                                                 |
| 13                                    | 341                         | 117                      | 0.51 (0.40, 0.64)                                                 | 53                                | 37                       | 0.57 (0.34, 0.97)                                                 | 44                                 | 60                       | 2.03 (1.13, 3.61)                                                 |
| 14                                    | 0                           | 117                      | 0.51 (0.40, 0.64)                                                 | 0                                 | 37                       | 0.57 (0.34, 0.97)                                                 | 0                                  | 60                       | 2.03 (1.13, 3.61)                                                 |
| <b>B. Colorectal cancer mortality</b> |                             |                          |                                                                   |                                   |                          |                                                                   |                                    |                          |                                                                   |
| 0                                     | 45881                       | 0                        | 0.00 (0.00, 0.00)                                                 | 10978                             | 0                        | 0.00 (0.00, 0.00)                                                 | 7563                               | 0                        | 0.00 (0.00, 0.00)                                                 |
| 1                                     | 44036                       | 2                        | 0.00 (0.00, 0.02)                                                 | 10525                             | 0                        | 0.00 (0.00, 0.00)                                                 | 7225                               | 0                        | 0.01 (0.00, 0.10)                                                 |
| 2                                     | 41924                       | 3                        | 0.01 (0.00, 0.02)                                                 | 9989                              | 0                        | 0.01 (0.00, 0.07)                                                 | 6840                               | 2                        | 0.04 (0.01, 0.13)                                                 |
| 3                                     | 40131                       | 4                        | 0.01 (0.00, 0.03)                                                 | 9561                              | 0                        | 0.01 (0.00, 0.07)                                                 | 6514                               | 3                        | 0.06 (0.02, 0.16)                                                 |
| 4                                     | 38508                       | 10                       | 0.02 (0.01, 0.05)                                                 | 9156                              | 1                        | 0.01 (0.00, 0.07)                                                 | 6196                               | 4                        | 0.08 (0.03, 0.18)                                                 |
| 5                                     | 37072                       | 12                       | 0.03 (0.02, 0.05)                                                 | 8799                              | 1                        | 0.02 (0.01, 0.09)                                                 | 5915                               | 6                        | 0.09 (0.04, 0.20)                                                 |
| 6                                     | 35721                       | 14                       | 0.04 (0.02, 0.06)                                                 | 8468                              | 2                        | 0.03 (0.01, 0.11)                                                 | 5674                               | 8                        | 0.13 (0.06, 0.25)                                                 |
| 7                                     | 34481                       | 19                       | 0.05 (0.03, 0.08)                                                 | 8127                              | 3                        | 0.03 (0.01, 0.11)                                                 | 5448                               | 8                        | 0.15 (0.08, 0.28)                                                 |
| 8                                     | 24010                       | 19                       | 0.05 (0.03, 0.08)                                                 | 5340                              | 3                        | 0.03 (0.01, 0.11)                                                 | 3655                               | 10                       | 0.20 (0.11, 0.37)                                                 |
| 9                                     | 16200                       | 21                       | 0.06 (0.04, 0.09)                                                 | 3433                              | 3                        | 0.03 (0.01, 0.11)                                                 | 2273                               | 11                       | 0.25 (0.13, 0.47)                                                 |
| 10                                    | 9439                        | 21                       | 0.07 (0.04, 0.12)                                                 | 1799                              | 3                        | 0.03 (0.01, 0.11)                                                 | 1057                               | 12                       | 0.25 (0.13, 0.47)                                                 |
| 11                                    | 4729                        | 22                       | 0.07 (0.04, 0.12)                                                 | 856                               | 3                        | 0.03 (0.01, 0.11)                                                 | 497                                | 12                       | 0.55 (0.18, 1.69)                                                 |
| 12                                    | 1540                        | 22                       | 0.07 (0.04, 0.12)                                                 | 282                               | 3                        | 0.03 (0.01, 0.11)                                                 | 191                                | 13                       | 0.55 (0.18, 1.69)                                                 |
| 13                                    | 342                         | 22                       | 0.07 (0.04, 0.12)                                                 | 54                                | 3                        | 0.03 (0.01, 0.11)                                                 | 45                                 | 13                       | 0.55 (0.18, 1.69)                                                 |
| 14                                    | 0                           | 22                       | 0.07 (0.04, 0.12)                                                 | 0                                 | 3                        | 0.03 (0.01, 0.11)                                                 | 0                                  | 13                       | 0.55 (0.18, 1.69)                                                 |

No, Number; CI, confidence interval; <sup>a</sup>Cumulative event probability was calculated using Kaplan-Meier analysis

**Supplemental Table 3.** Risk of colorectal cancer after low- and high-risk adenoma removal compared to no adenoma by age, sex, race/ethnicity, adenoma detection rate, baseline exam indication, and baseline body mass index: stratified analyses

| Strata                             | Colorectal Cancer Incidence |          |                       |          |
|------------------------------------|-----------------------------|----------|-----------------------|----------|
|                                    | Low-Risk Adenoma            |          | High-Risk Adenoma     |          |
|                                    | Hazard Ratio (95% CI)       | P-value* | Hazard Ratio (95% CI) | P-value* |
| Age, years                         |                             | 0.46     |                       | 0.97     |
| 50-64                              | 1.28 (0.72, 2.28)           |          | 3.13 (1.92, 5.11)     |          |
| 65-75                              | 1.30 (0.79, 2.14)           |          | 2.27 (1.45, 3.56)     |          |
| Sex                                |                             | 0.52     |                       | 0.91     |
| Male                               | 1.15 (0.66, 1.98)           |          | 2.71 (1.73, 4.26)     |          |
| Female                             | 1.46 (0.87, 2.45)           |          | 2.47 (1.51, 4.02)     |          |
| Race                               |                             | 0.38     |                       | 0.94     |
| Black                              | 2.08 (0.61, 7.12)           |          | 2.46 (0.75, 8.03)     |          |
| Non-Black                          | 1.24 (0.83, 1.84)           |          | 2.65 (1.88, 3.75)     |          |
| Body mass index, kg/m <sup>2</sup> |                             | 0.39     |                       | 0.31     |
| <25                                | 1.79 (0.92, 3.48)           |          | 3.61 (1.97, 6.62)     |          |
| ≥25                                | 1.13 (0.72, 1.79)           |          | 2.29 (1.54, 3.39)     |          |
| Examination indication             |                             | 0.62     |                       | 0.84     |
| Screening                          | 1.10 (0.45, 2.66)           |          | 2.86 (1.23, 6.66)     |          |
| FIT-positive                       | 1.68 (1.00, 2.84)           |          | 1.99 (1.22, 3.23)     |          |
| Non-screening                      | 0.81 (0.38, 1.72)           |          | 3.82 (2.30, 6.36)     |          |
| Adenoma detection rate, %          |                             | 0.47     |                       | 0.37     |
| <25                                | 1.15 (0.71, 1.87)           |          | 2.23 (1.47, 3.39)     |          |
| ≥25                                | 1.71 (0.93, 3.15)           |          | 3.85 (2.21, 6.72)     |          |

CI, confidence Interval; FIT, fecal immunochemical test

\*P-value for interaction

**Supplemental Table 4.** Subsequent colonoscopy utilization and yield by baseline colonoscopy findings

| Years of Follow-up                                                                                                                                     | No adenoma on baseline exam |                          |                                                                       | Low-risk adenoma on baseline exam |                          |                                                                       | High-risk adenoma on baseline exam |                          |                                                                       |
|--------------------------------------------------------------------------------------------------------------------------------------------------------|-----------------------------|--------------------------|-----------------------------------------------------------------------|-----------------------------------|--------------------------|-----------------------------------------------------------------------|------------------------------------|--------------------------|-----------------------------------------------------------------------|
|                                                                                                                                                        | No. At Risk                 | No. of Cumulative Events | Cumulative Event Probability of A, B, or C (%), (95% CI) <sup>b</sup> | No. At Risk                       | No. of Cumulative Events | Cumulative Event Probability of A, B, or C (%), (95% CI) <sup>b</sup> | No. At Risk                        | No. of Cumulative Events | Cumulative Event Probability of A, B, or C (%), (95% CI) <sup>b</sup> |
| A. Subsequent colonoscopy by years of follow-up (among individuals who had a baseline exam finding of high-risk adenoma, low-risk adenoma, no adenoma) |                             |                          |                                                                       |                                   |                          |                                                                       |                                    |                          |                                                                       |
| 2                                                                                                                                                      | 41102                       | 1                        | 0.00 (0.00 - 0.02 )                                                   | 9710                              | 1                        | 0.01 (0.00 - 0.07 )                                                   | 5897                               | 4                        | 0.07 (0.03 - 0.18 )                                                   |
| 3                                                                                                                                                      | 38801                       | 563                      | 1.40 (1.29 - 1.52 )                                                   | 9129                              | 183                      | 1.93 (1.68 - 2.23 )                                                   | 5151                               | 470                      | 8.25 (7.56 - 8.99 )                                                   |
| 4                                                                                                                                                      | 36563                       | 1258                     | 3.21 (3.04 - 3.39 )                                                   | 8328                              | 597                      | 6.47 (5.98 - 6.99 )                                                   | 3621                               | 1772                     | 31.90 (30.69 - 33.15)                                                 |
| 5                                                                                                                                                      | 34325                       | 2175                     | 5.69 (5.46 - 5.92 )                                                   | 7329                              | 1298                     | 14.54 (13.82 - 15.29)                                                 | 2899                               | 2329                     | 42.68 (41.37 - 44.01)                                                 |
| 6                                                                                                                                                      | 31864                       | 3443                     | 9.23 (8.94 - 9.53 )                                                   | 4909                              | 3485                     | 40.46 (39.43 - 41.51)                                                 | 1929                               | 3185                     | 59.99 (58.65 - 61.33)                                                 |
| 7                                                                                                                                                      | 29924                       | 4334                     | 11.81 (11.48 - 12.15)                                                 | 3978                              | 4225                     | 49.62 (48.55 - 50.69)                                                 | 1486                               | 3539                     | 67.51 (66.21 - 68.80)                                                 |
| 8                                                                                                                                                      | 19972                       | 4956                     | 14.00 (13.64 - 14.37)                                                 | 2287                              | 4483                     | 53.60 (52.51 - 54.70)                                                 | 941                                | 3642                     | 70.18 (68.88 - 71.46)                                                 |
| 9                                                                                                                                                      | 12798                       | 5383                     | 16.25 (15.84 - 16.67)                                                 | 1368                              | 4590                     | 56.27 (55.13 - 57.42)                                                 | 544                                | 3682                     | 71.76 (70.44 - 73.07)                                                 |
| 10                                                                                                                                                     | 6870                        | 5777                     | 19.77 (19.25 - 20.31)                                                 | 654                               | 4644                     | 58.78 (57.52 - 60.05)                                                 | 261                                | 3694                     | 72.67 (71.29 - 74.03)                                                 |
| B. Any adenoma removal by years of follow-up (among those who underwent a subsequent colonoscopy)                                                      |                             |                          |                                                                       |                                   |                          |                                                                       |                                    |                          |                                                                       |
| 2                                                                                                                                                      | 6152                        | 1                        | 0.02 (0.00 - 0.12 )                                                   | 4670                              | 1                        | 0.02 (0.00 - 0.15 )                                                   | 3698                               | 2                        | 0.05 (0.01 - 0.22 )                                                   |
| 3                                                                                                                                                      | 6038                        | 104                      | 1.69 (1.40 - 2.05 )                                                   | 4589                              | 82                       | 1.76 (1.42 - 2.18 )                                                   | 3462                               | 234                      | 6.33 (5.59 - 7.17 )                                                   |
| 4                                                                                                                                                      | 5845                        | 258                      | 4.21 (3.73 - 4.74 )                                                   | 4398                              | 262                      | 5.62 (4.99 - 6.31 )                                                   | 2699                               | 961                      | 26.09 (24.70 - 27.54)                                                 |
| 5                                                                                                                                                      | 5556                        | 496                      | 8.13 (7.47 - 8.84 )                                                   | 4061                              | 584                      | 12.54 (11.62 - 13.53)                                                 | 2337                               | 1295                     | 35.30 (33.78 - 36.87)                                                 |
| 6                                                                                                                                                      | 5046                        | 905                      | 14.95 (14.08 - 15.87)                                                 | 2875                              | 1728                     | 37.30 (35.92 - 38.71)                                                 | 1767                               | 1816                     | 49.86 (48.24 - 51.50)                                                 |
| 7                                                                                                                                                      | 4653                        | 1172                     | 19.51 (18.53 - 20.54)                                                 | 2398                              | 2132                     | 46.21 (44.78 - 47.67)                                                 | 1496                               | 2040                     | 56.29 (54.67 - 57.92)                                                 |
| 8                                                                                                                                                      | 3768                        | 1386                     | 23.49 (22.43 - 24.60)                                                 | 1665                              | 2276                     | 49.84 (48.39 - 51.31)                                                 | 1010                               | 2104                     | 58.50 (56.87 - 60.13)                                                 |
| 9                                                                                                                                                      | 2976                        | 1535                     | 26.78 (25.64 - 27.96)                                                 | 1112                              | 2333                     | 51.88 (50.39 - 53.39)                                                 | 676                                | 2129                     | 59.75 (58.10 - 61.40)                                                 |
| 10                                                                                                                                                     | 2046                        | 1691                     | 31.33 (30.06 - 32.65)                                                 | 638                               | 2370                     | 53.93 (52.36 - 55.52)                                                 | 328                                | 2136                     | 60.39 (58.70 - 62.09)                                                 |
| C. Advanced adenoma <sup>a</sup> removal by years of follow-up (among those who underwent a subsequent colonoscopy)                                    |                             |                          |                                                                       |                                   |                          |                                                                       |                                    |                          |                                                                       |
| 2                                                                                                                                                      | 6152                        | 1                        | 0.02 (0.00 - 0.12 )                                                   | 4670                              | 1                        | 0.02 (0.00 - 0.15 )                                                   | 3698                               | 1                        | 0.03 (0.00 - 0.19 )                                                   |
| 3                                                                                                                                                      | 6122                        | 16                       | 0.26 (0.16 - 0.42 )                                                   | 4657                              | 12                       | 0.26 (0.15 - 0.45 )                                                   | 3639                               | 53                       | 1.43 (1.10 - 1.87 )                                                   |
| 4                                                                                                                                                      | 6050                        | 43                       | 0.70 (0.52 - 0.94 )                                                   | 4618                              | 35                       | 0.75 (0.54 - 1.04 )                                                   | 3439                               | 202                      | 5.49 (4.80 - 6.27 )                                                   |
| 5                                                                                                                                                      | 5961                        | 64                       | 1.05 (0.82 - 1.34 )                                                   | 4539                              | 76                       | 1.64 (1.31 - 2.04 )                                                   | 3301                               | 275                      | 7.52 (6.71 - 8.42 )                                                   |
| 6                                                                                                                                                      | 5796                        | 105                      | 1.74 (1.44 - 2.10 )                                                   | 4345                              | 187                      | 4.06 (3.53 - 4.67 )                                                   | 3104                               | 379                      | 10.46 (9.51 - 11.50)                                                  |
| 7                                                                                                                                                      | 5598                        | 137                      | 2.29 (1.94 - 2.70 )                                                   | 4167                              | 231                      | 5.04 (4.45 - 5.72 )                                                   | 2946                               | 443                      | 12.33 (11.30 - 13.45)                                                 |
| 8                                                                                                                                                      | 4629                        | 161                      | 2.75 (2.36 - 3.20 )                                                   | 2944                              | 245                      | 5.44 (4.81 - 6.15 )                                                   | 1911                               | 458                      | 12.88 (11.81 - 14.03)                                                 |
| 9                                                                                                                                                      | 3674                        | 187                      | 3.35 (2.90 - 3.86 )                                                   | 1936                              | 254                      | 5.80 (5.13 - 6.54 )                                                   | 1288                               | 463                      | 13.16 (12.08 - 14.34)                                                 |
| 10                                                                                                                                                     | 2643                        | 205                      | 3.94 (3.43 - 4.52 )                                                   | 1065                              | 263                      | 6.42 (5.66 - 7.29 )                                                   | 642                                | 464                      | 13.30 (12.19 - 14.51)                                                 |

No, Number; CI, confidence interval; <sup>a</sup>Advanced adenoma defined as any conventional adenoma with high-grade dysplasia or villous component; or any conventional adenoma  $\geq 10$  mm in size; <sup>b</sup>Cumulative event probability was calculated using Kaplan-Meier analysis

Supplemental Figure 1. Algorithm to classify high- and low-risk adenomas using a combination of natural language processing and SNOMED pathology codes

Supplemental Figure 2. Cumulative mortality from colorectal cancer by adenoma findings at the baseline colonoscopy

Supplemental Table 1. Age-adjusted colorectal cancer incidence rates per 100,000 by year since colonoscopy

Supplemental Table 2. Cumulative colorectal cancer incidence and mortality by adenoma findings at the baseline colonoscopy

Supplemental Table 3. Risk of colorectal cancer after low- and high-risk adenoma removal compared to no adenoma by age, sex, race/ethnicity, adenoma detection rate, exam indication, and body mass index: stratified analyses

Supplemental Table 4. Subsequent colonoscopy utilization and yield by baseline colonoscopy findings

Journal Pre-proof

**Supplemental Figure 1.** Algorithm to classify low- and high-risk adenomas using a combination of natural language processing (NLP) and SNOMED pathology codes

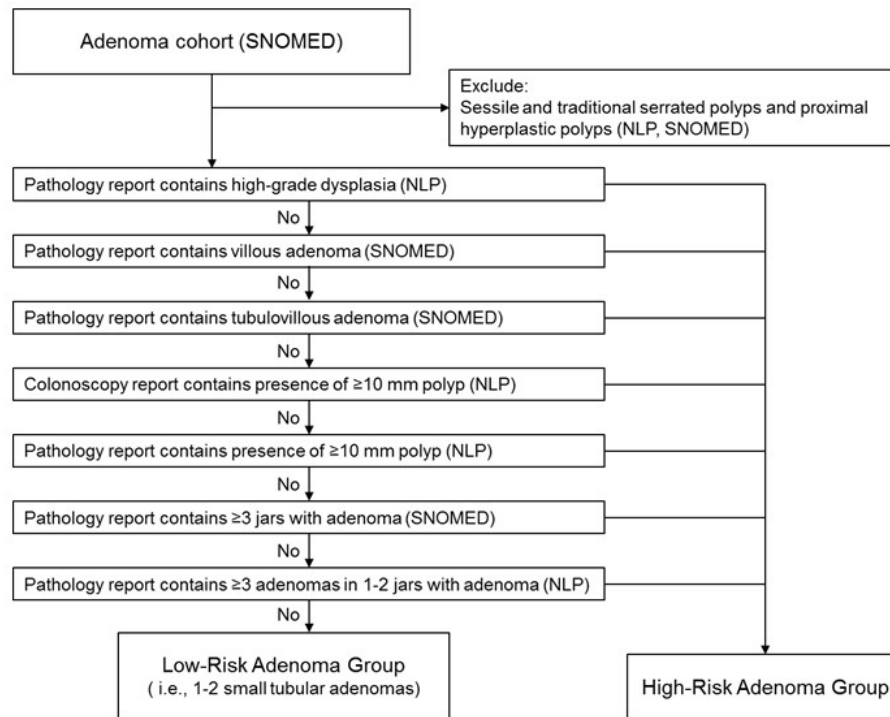

SNOMED: Systematized Nomenclature of Medicine codes; NLP: natural language processing

Jour

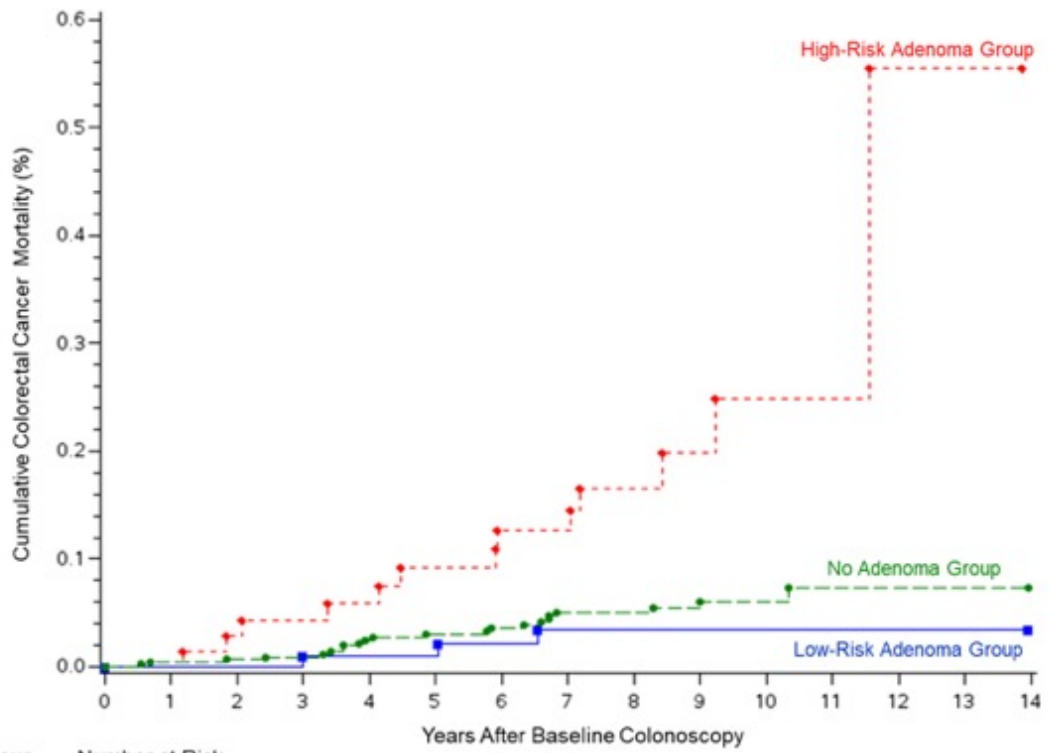

| Group             | Number at Risk |       |       |       |       |      |      |   |
|-------------------|----------------|-------|-------|-------|-------|------|------|---|
| No Adenoma        | 45881          | 41924 | 38508 | 35721 | 24010 | 9439 | 1540 | 0 |
| Low-Risk Adenoma  | 10978          | 9989  | 9156  | 8468  | 5340  | 1799 | 282  | 0 |
| High-Risk Adenoma | 7563           | 6840  | 6196  | 5674  | 3655  | 1057 | 191  | 0 |

Journal
